# Supplementary material
Source: Springer Nature journal article supplement (https://www.springermedizin.de/resource/supplementary/12885_2010_2253_MOESM10_ESM.pdf/9460862)

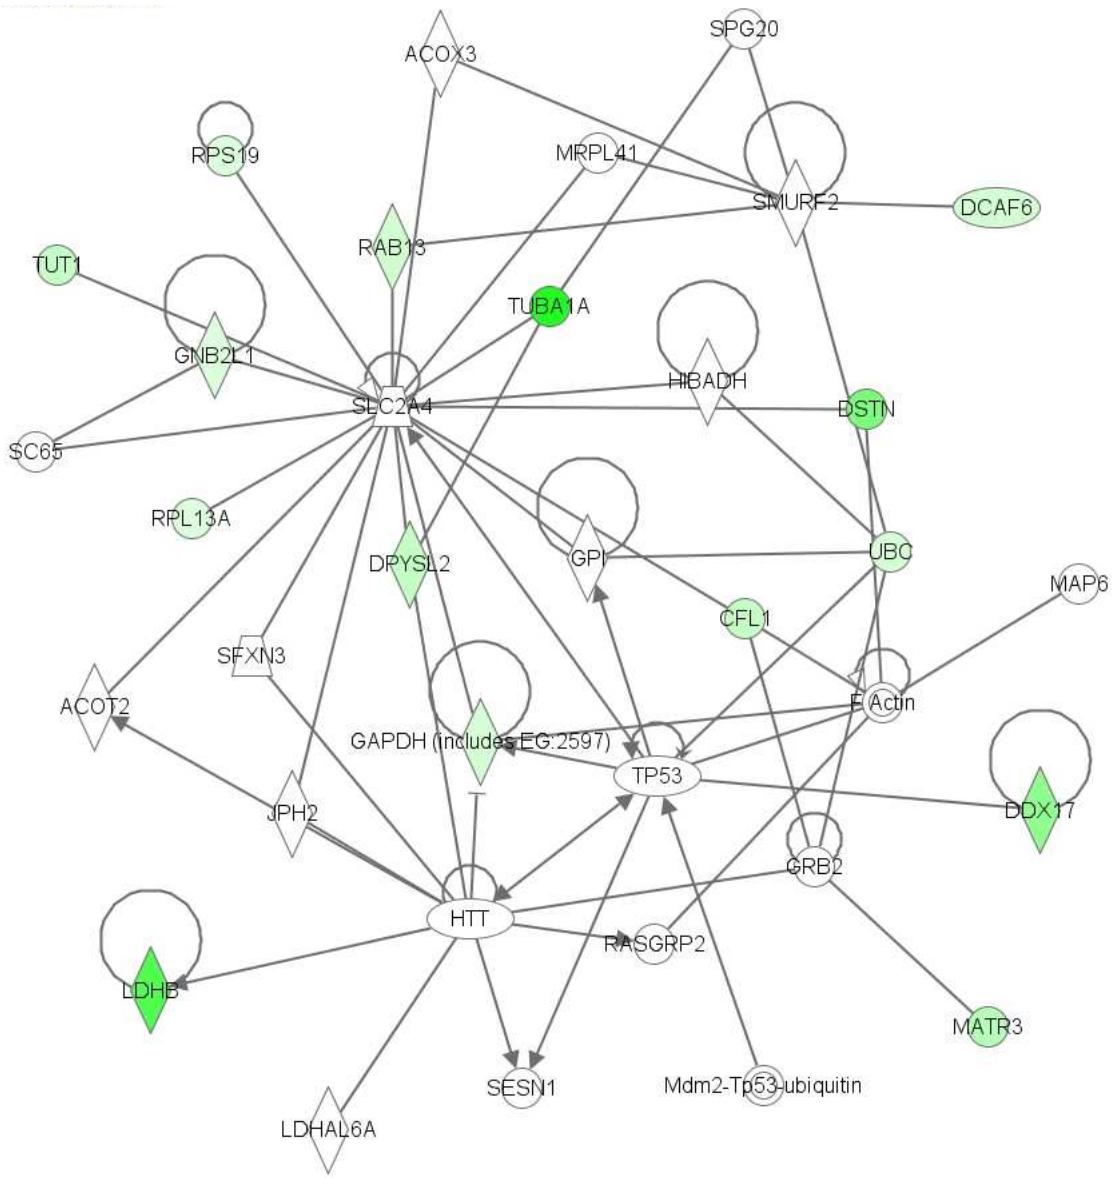

Supplement: MOESM10 [file 9460862]
